# Supplementary material for: Mitochondria-derived peptide SHLP2 regulates energy homeostasis through the activation of hypothalamic neurons
Source: PubMed Central journal article supplement (PMC10356901; doi:10.1038/s41467-023-40082-7), 2023-07-19
Supplement: 41467_2023_40082_MOESM1_ESM.pdf [file 41467_2023_40082_MOESM1_ESM.pdf]

**Mitochondria-derived peptide SHLP2 regulates energy homeostasis through the  
activation of hypothalamic neurons**

Seul Ki Kim<sup>1,2</sup>, Le Trung Tran<sup>1,2</sup>, Cherl NamKoong<sup>3</sup>, Hyung Jin Choi<sup>3,4</sup>, Hye Jin Chun<sup>5</sup>,  
Yong-ho Lee<sup>5</sup>, MyungHyun Cheon<sup>6</sup>, ChiHye Chung<sup>6</sup>, Junmo Hwang<sup>7</sup>, Hyun-Ho Lim<sup>7</sup>, Dong  
Min Shin<sup>1,2</sup>, Yun-Hee Choi<sup>1</sup>, and Ki Woo Kim<sup>1,2\*</sup>

<sup>1</sup>Division of Physiology, Department of Oral Biology, Yonsei University College of Dentistry,  
Seoul, 03722, Korea

<sup>2</sup>Department of Applied Life Science, BK21 FOUR, Yonsei University College of Dentistry,  
Seoul, 03722, Korea

<sup>3</sup>Neuroscience Research Institute, Seoul National University College of Medicine, Seoul,  
03080, Korea

<sup>4</sup>Department of Biomedical Sciences, Seoul National University College of Medicine, Seoul,  
03080, Korea

<sup>5</sup>Department of Internal Medicine, Yonsei University College of Medicine, Seoul, 03722,  
Korea

<sup>6</sup>Department of Biological Sciences, Konkuk University, Seoul, 05029, Korea

<sup>7</sup>Neurovascular Unit Research Group, Korea Brain Research Institute (KBRI), Daegu, 41068,  
Korea

\*Correspondence and reprints, materials should be addressed to:

Ki Woo Kim ([kiwoo-kim@yuhs.ac](mailto:kiwoo-kim@yuhs.ac))

**SUPPLEMENTARY INFORMATION**

**Supplementary Figure 1-6**

**Supplementary Tables 1-3**

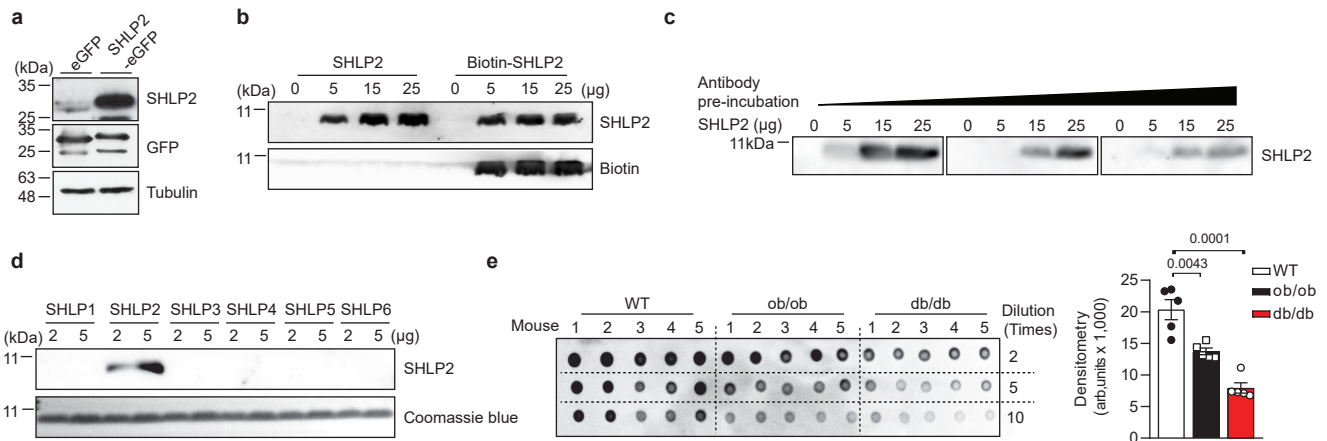

### Supplementary Fig. 1: Validation of SHLP2 antibody.

**a**, Detection of SHLP2 after overexpression of SHLP2-eGFP construction in HEK 293 cells. Western blots were performed using anti-SHLP2, anti-GFP or anti-tubulin antibodies. **b**, Detection of SHLP2 and biotinylated SHLP2 peptides using anti-SHLP2 and anti-biotin antibodies. **c**, Peptide competition assays using SHLP2 peptides. Anti-SHLP2 antibody was incubated in the presence of increasing amounts (1, 5, 15, 25 μg) of each peptide indicated. **d**, Detection of SHLP1 to 6 using anti-SHLP2 antibody. **e**, Dot-blot image (left) and relative blot densitometry (right) detecting plasma SHLP2 levels in WT, *ob/ob* and *db/db* male mice ( $n = 5$  each group). Data shown are representative of three independent experiments with similar results (**a-d**).  $n$  indicates the number of biologically independent mice examined. Data were presented as mean  $\pm$  SEM. Two-tailed Student's t-tests were used. Source data are provided as a Source Data file.

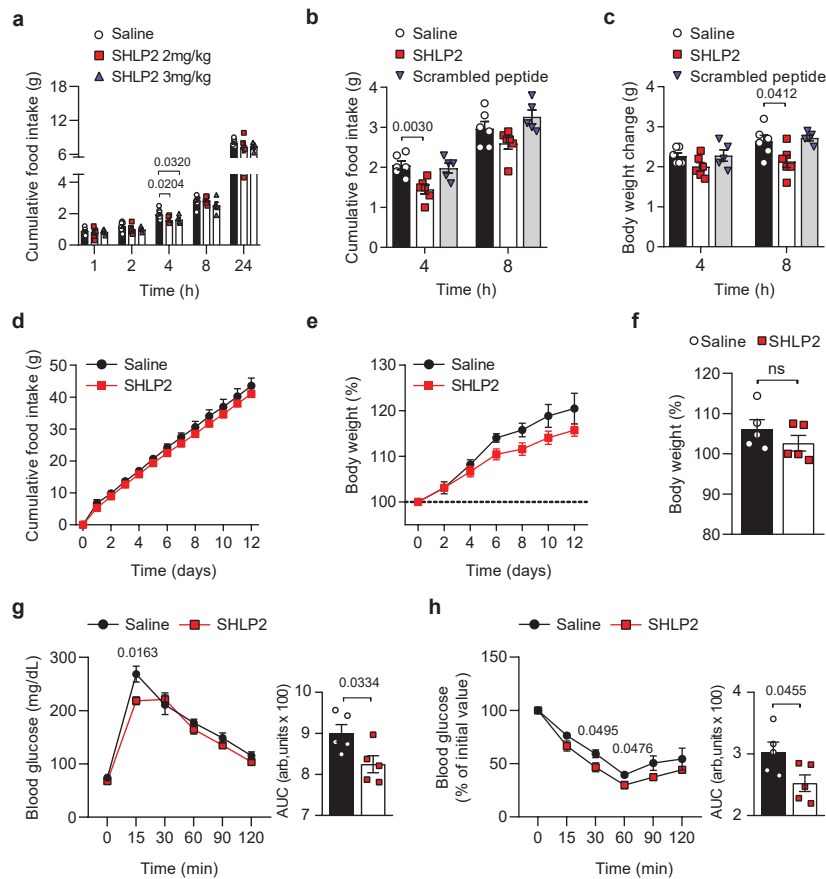

**Supplementary Fig. 2: Temporal changes in food intake and body weight, as well as the results of the ITT and GTT, in normal chow-fed mice after an IP injection of SHLP2**

**a**, Cumulative food intake (left) of male mice fed with NC after IP injection of saline or 2, 3mg/kg SHLP2 ( $n = 9$  saline,  $n = 5$  each SHLP2 group). **b-c**, Cumulative food intake (**b**) and body weight change (**c**) of male mice fed with NC after IP injection of saline or SHLP2 or scrambled peptide following an overnight fasting ( $n = 6$  saline,  $n = 6$  SHLP2,  $n = 5$  scrambled peptide). **d-e**, Cumulative food intake (**d**) and body weight change (% of initial) (**e**) were monitored after daily IP injection of either saline or SHLP2 in male mice ( $n = 3$  saline,  $n = 5$  SHLP2). **f**, Body weight (% of initial) of male mice fed with NC after daily IP injection of saline or SHLP2 for 3 weeks ( $n = 5$  each group). **g-h**, GTT (**g**) and ITT (**h**) were performed in NC-fed male mice after 3 weeks of IP administration of saline or SHLP2 ( $n = 5$  each group).  $n$  indicates the number of biologically independent mice examined. Data were presented as mean  $\pm$  SEM. Two-tailed Student's t-tests were used. Source data are provided as a Source Data file.

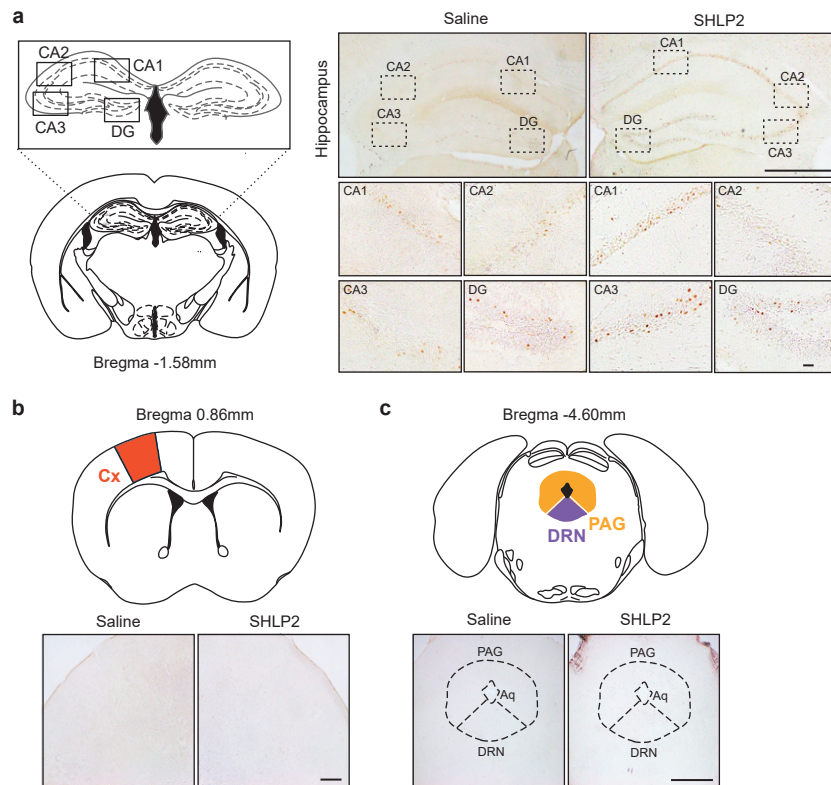

**Supplementary Fig. 3: c-Fos activation in different brain regions in response to SHLP2.**

**a-c**, c-Fos immunoactivity after SHLP2 administration (IP) in the hippocampus (**a**), cortex (Cx, **b**), periaqueductal gray (PAG, **c**) and dorsal raphe nucleus (DRN, **c**) ( $n = 4$  each group). CA, cornu amonis. DG, dentate gyrus. Aq, aqueduct.  $n$  indicates the number of biologically independent mice examined. Scale bars, 100 $\mu$ m. Source data are provided as a Source Data file.



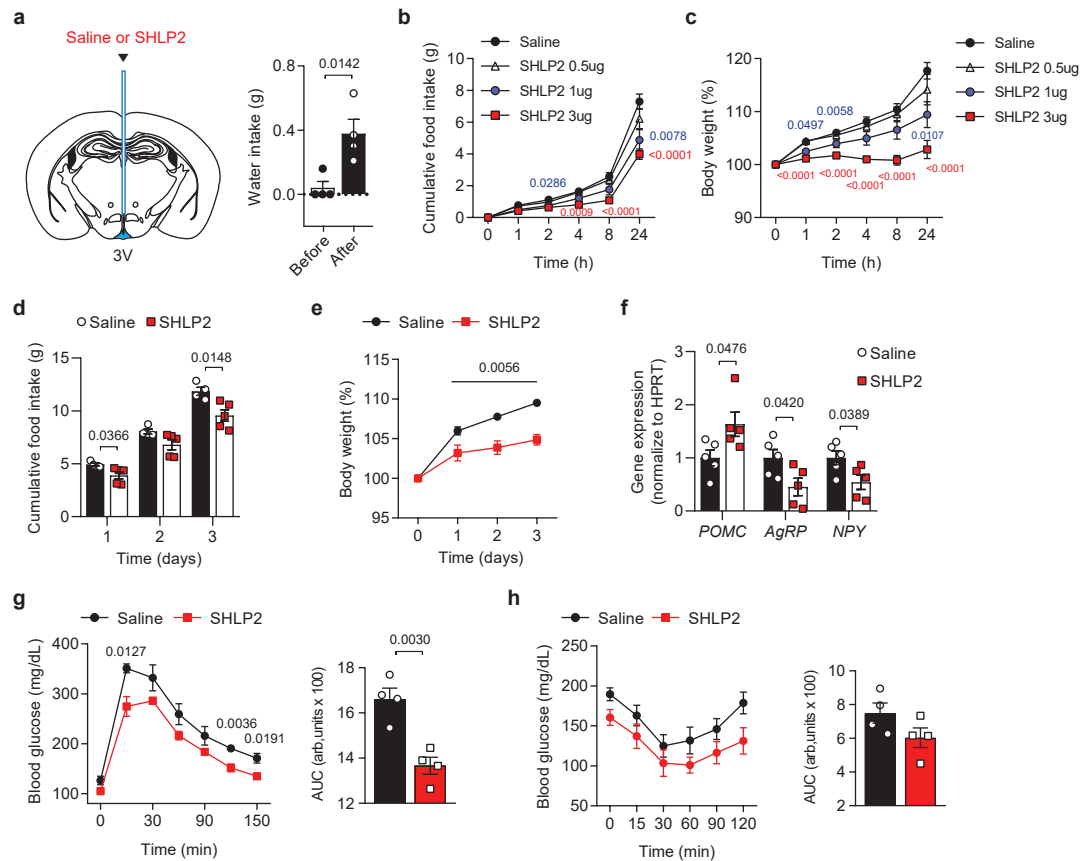

#### Supplementary Fig. 4: Long-term SHLP2 treatment ameliorates HFD-induced obesity.

**a**, Schematic for experimental configuration. A guide cannula was implanted to the 3V to deliver saline or SHLP2 (left). Water intake (right) following an acute ICV administration of angiotensin II ( $n = 4$  each group). **b-c**, Cumulative food intake (**b**) and body weight (% of initial) (**c**) of male mice fed with NC after ICV injection of saline or 0.5, 1, 3 $\mu$ g SHLP2 ( $n = 10$  each group). **d-e**, Cumulative food intake (**d**) and body weight (% of initial) (**e**) of HFD-fed male mice following a single ICV injection of saline or SHLP2 ( $n = 4$  saline,  $n = 5$  SHLP2). **f**, The *Pomc*, *AgRP* and *Npy* expression in the hypothalamus of male mice fed HFD after one hour of ICV injection of Saline or SHLP2 ( $n = 4$  saline,  $n = 5$  SHLP2). **g-h**, GTT (**g**) and ITT (**h**) were performed in HFD-fed male mice after 4 hours of ICV administration of saline or SHLP2 ( $n = 4$  each group).  $n$  indicates the number of biologically independent mice examined. Data were presented as mean  $\pm$  SEM. Two-tailed Student's t-tests were used, and two-way ANOVA with Bonferroni post-hoc tests were used in figure (**e**). Source data are provided as a Source Data file.

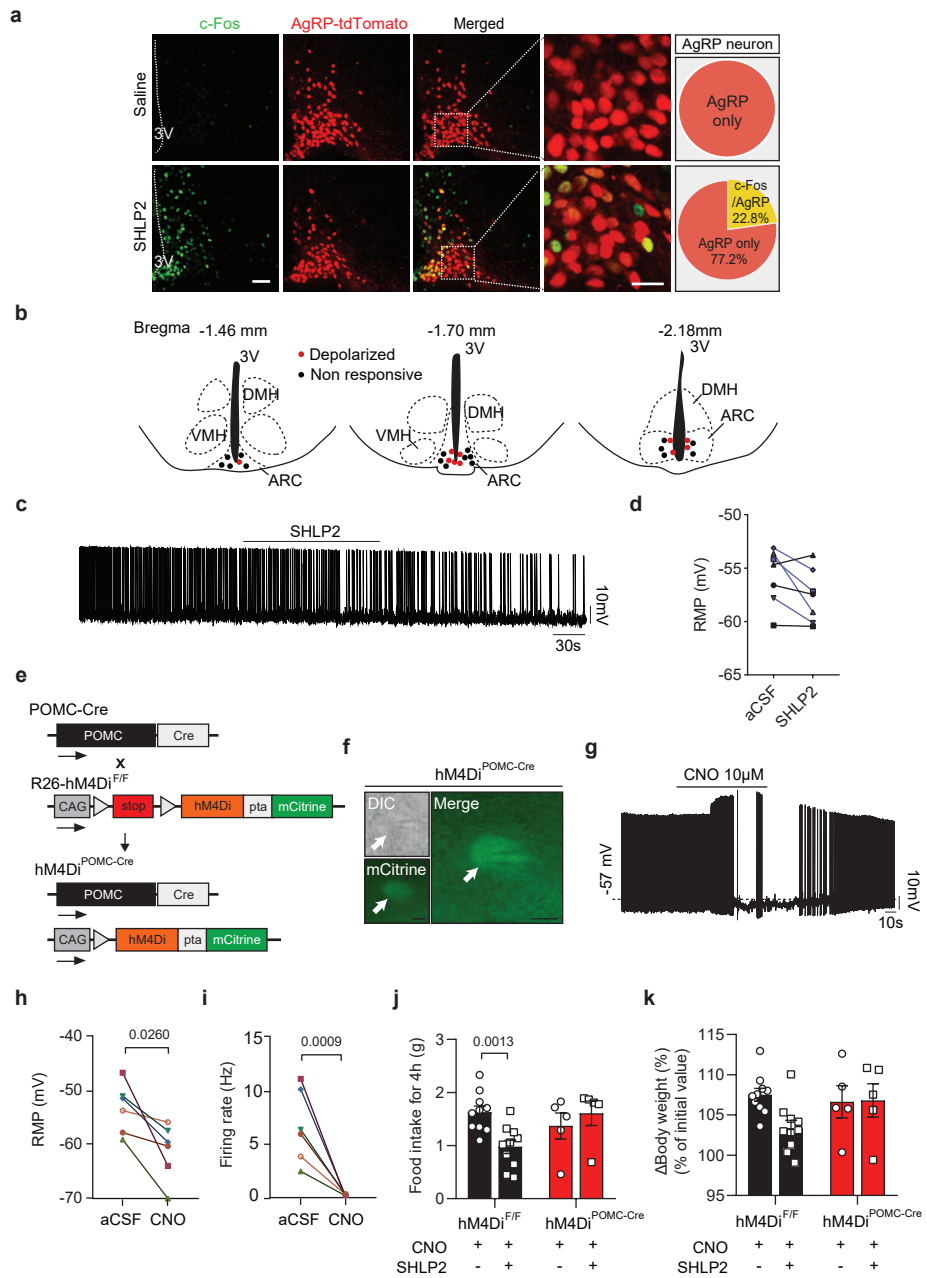

**Supplementary Fig. 5: Effect of SHLP2 on POMC and AgRP neurons.**

**a**, Percentage of c-Fos activation in AgRP neurons after an ICV administration of SHLP2 ( $n = 3$ ). Scale bars, 20 $\mu$ m. **b**, Diagram showing the location and responses of recorded POMC neurons across the mediobasal hypothalamus. **c-d**, Representative trace (**c**) of AgRP neurons and effects on resting membrane potential (RMP) (**d**) of a subset of AgRP neurons. **e**, Schematic strategy for recombinant transgenes to generate hM4Di<sup>POMC-Cre</sup> male mice. **f**, Fluorescent and DIC figures of targeted POMC neurons expressing the Cre-dependent modified form of the hM4Di receptor in fusion with the fluorescence protein mCitrine. The arrows indicate the targeted cell ( $n = 6$  from 2 animals). **g-i**, Representative inhibition of POMC neuron (**g**) by CNO application. CNO induced hyperpolarization of POMC neurons expressing hM4Di, showing through decreases in the resting membrane potentials (**h**) and firing rates (**i**) ( $n = 6$  from 2 animals). **j-k**, Cumulative food intake (**j**) and  $\Delta$ body weight (%) (**k**) in hM4Di<sup>POMC-Cre</sup> male mice after ICV SHLP2 administration with CNO injection ( $n = 10$  each hM4Di<sup>F/F</sup> group,  $n = 5$  each hM4Di<sup>POMC-Cre</sup> group). Scale bars, 5 $\mu$ m.  $n$  indicates the number of biologically independent mice examined. Data were presented as mean  $\pm$  SEM. Two-tailed Student's t-tests were used. Wilcoxon matched-pairs signed rank test were used in electrophysiological result. CAG, CMV immediate enhancer/ $\beta$ -actin promoter; hM4Di, Gi-coupled hM4D DREADD; pta, porcine Teschovirus cleavage site; mCitrine; citrine fluorescence. Source data are provided as a Source Data file.

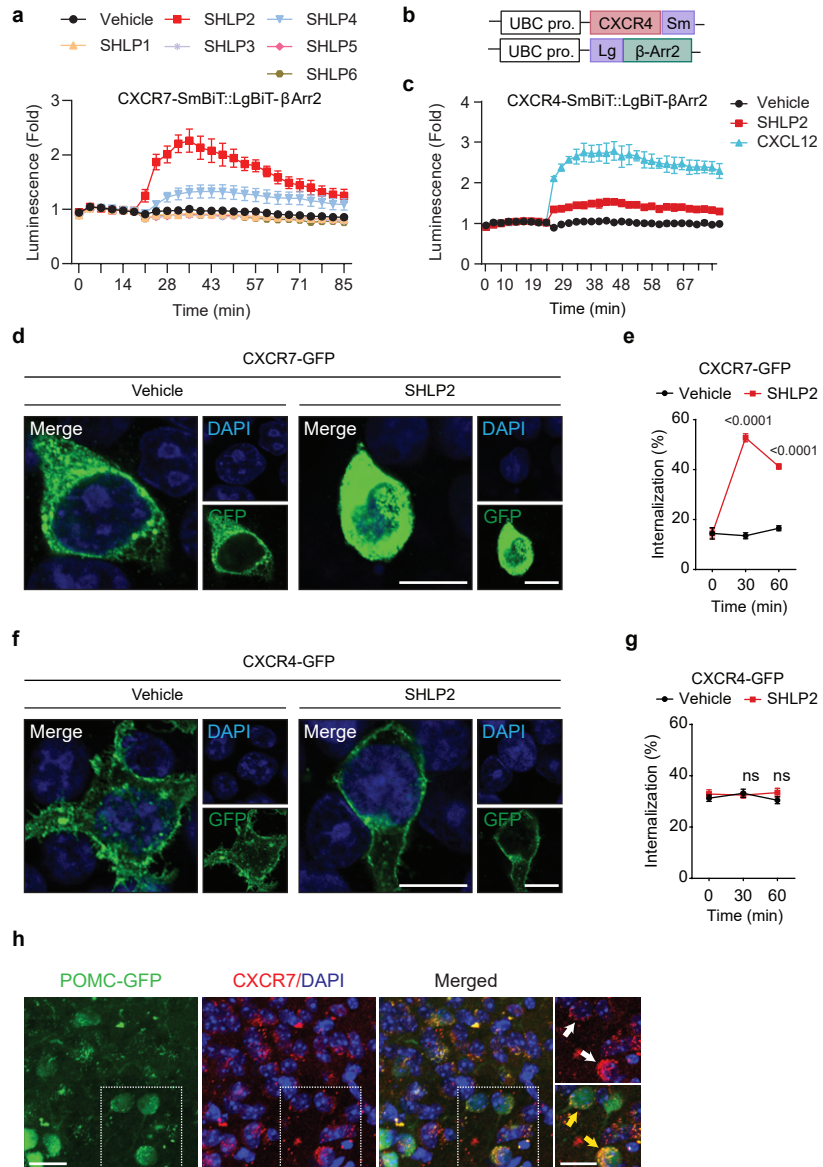

**Supplementary Fig. 6: SHLP2 interacts specifically with CXCR7, but not CXCR4.**

**a**, The  $\beta$ -Arrestin2 recruitment to CXCR7 by SHLP 1 to 6 ( $n = 4$  each group). Note that the only SHLP2 exhibited specific activity. **b**, The DNA constructs used to for the NanoLuc complementation-based  $\beta$ -Arrestin2 recruitment to the chemokine receptor CXCR4. **c**, Representative result of  $\beta$ -Arrestin2 recruitment assay to CXCR4 ( $n = 3$  saline,  $n = 3$  CXCL12,  $n = 4$  SHLP2). Note that there is no notable activity by SHLP2 **d**, Representative immunofluorescent staining of CXCR7 upon the application of SHLP2. **e**, The percentage of internalized receptors CXCR7 at different time points after the treatment of SHLP2 ( $n = 3$  each group). **f**, Representative immunofluorescent staining of CXCR4 upon the application of SHLP2. **g**, The percentage of internalized receptors CXCR4 at different time points after the treatment of SHLP2 ( $n = 3$  each group). Scale bars,  $10\mu\text{m}$ . **h**, Representative images of CXCR7 expression in POMC neurons ( $n = 3$  each group). Scale bars,  $50\mu\text{m}$ .  $n$  indicates the number of biologically independent experimental groups examined. Data were presented as mean  $\pm$  SD. ns: no significance by two-way ANOVA followed by Sidak multiple comparison tests (**e and g**). Source data are provided as a Source Data file.

**Supplementary Table 1. The clinical characteristics of the study subjects**

|                          | Healthy (n= 7) | Obese (n= 6) | Diabetic (n= 7) |
|--------------------------|----------------|--------------|-----------------|
| Age (year)               | 55.1± 14.9     | 41.3±23.7    | 42.3± 18.7      |
| BMI (kg/m <sup>2</sup> ) | 22.6±5.1       | 31.9±2.9     | 31.4±2.3        |
| TG (mg/dL)               | 85.4± 101.8    | 192.2± 164.8 | 174.4± 190.6    |
| Cholesterol (mg/dL)      | 195.3±43.7     | 217.2±32.2   | 202.3±28.7      |
| AST (U/L)                | 24.9±9.1       | 36.8±21.2    | 34.4± 18.6      |
| ALT (IU/L)               | 22.7± 19.3     | 60.6±42.4    | 62.0±39         |
| Gamma-GT (U/L)           | 14.7± 11.3     | 46.8±45.2    | 57.9±61.1       |

BMI, Body mass index; TG, Triglyceride; AST, Aspartate aminotransferase; ALT, Alanine aminotransferase; Gamma-GT, Gamma-glutamyl transferase

**Supplementary Table 2. Primer sequences used for RT-PCR analyses**

| Gene                           | Forward primer (5' -3')   | Reverse primer (5' -3')   |
|--------------------------------|---------------------------|---------------------------|
| <i>Ucp1</i>                    | GGCAACAAGAGCTGACAGTA      | GGCCCTTGTAACAACAAAA       |
| <i>Cox2</i>                    | ATAACCGAGTCGTTCTGCCAAT    | TTTCAGAGCATTGGCCATAGAA    |
| <i>Rps18</i>                   | TGTGTTAGGGGACTGGTGGACA    | CATCACCCACTTACCCCAAAA     |
| <i>Pomc</i>                    | CAGGTCCTGGAGTCCGAC        | CATGAAGCCACCGTAACG        |
| <i>Npy</i>                     | CTACTCCGCTCTGCGACACT      | AGTGTCTCAGGGCTGGATCTC     |
| <i>AgRP</i>                    | CGGCCACGAACCTCTGTAG       | CTCATCCCCTGCCTTTGC        |
| <i>Cart</i>                    | AGAAGAAGTACGGCCAAGTC      | GGACAGTCACACAGCTTCC       |
| <i>Pgc1<math>\alpha</math></i> | AACCACACCCACAGGATCAGA     | TCTTCGCTTTATTGCTCCATGA    |
| <i>Dio2</i>                    | TTCTCCAAGTGCCTCTTCCTG     | CCCATCAGCGGTCTTCTCC       |
| <i>Ppar<math>\gamma</math></i> | CAAGAATACCAAAGTGCATCAA    | GAGCTGGTCTTTTCAGAATAAAG   |
| <i>Srebp-1c</i>                | GGAGCCATGGATTGCACATT      | GGCCCGGGAAGTCACTGT        |
| <i>Fasn</i>                    | GGTGTGGTGGGTTTGGTGAATTGT  | TCACGAGTCATGCTTTAGCACCT   |
| <i>Hprt</i>                    | CTCATGGACTGATTATGGACAGGAC | GCAGGTCAGCAAAGAACTTATAGCC |
| <i>Scd1</i>                    | AGTGCAGCAGGACCATGAGAATGA  | TCCCTCCGAAATGAACGAGAGAA   |
| <i>Acaca</i>                   | AGGAAGATGGTGTCCCGCTCTG    | GGGAGATGTGCTGGGTCAT       |
| <i>Fabp4</i>                   | AAGAGAAAACGAGATGGTGACAA   | CTTGTGGAAGTCACGCCTTT      |
| <i>Prdm16</i>                  | CGTCCACACGGAAGAGCGTGA     | TGGAGTTGCTGGGGTCCGT       |
| <i>Nrf1</i>                    | CGATGGGATTCCAGTCTCTGT     | TGAGCATCTCTGGGATAAATGC    |

**Supplementary Table 3. Sequences of peptides**

| Peptide name                         | Sequence                               |
|--------------------------------------|----------------------------------------|
| Small humanin-like peptide 1 (SHLP1) | MCHWAGGASNTGDARGDVFGKQAG               |
| Small humanin-like peptide 2 (SHLP2) | MGVKFFTLSTRFFPSVQRAVPLWTNS             |
| Small humanin-like peptide 3 (SHLP3) | MLGYNFSSFPCGTISIAPGFNFYRLYFIWVNGLAKVWW |
| Small humanin-like peptide 4 (SHLP4) | MLEVMFLVNRRGKICRVPFTFFNLSL             |
| Small humanin-like peptide 5 (SHLP5) | MYCSEVGFCESEVAPTEIFNAGLVV              |
| Small humanin-like peptide 6 (SHLP6) | MLDQDIPMVQPLLKVRLEND                   |
| Scrambled peptide                    | MKSFRVTVRPASLTSGVFTNLQFPWF             |
